# Supplementary material for: Changes in gross oxygen production, net oxygen production, and air-water gas exchange during seasonal ice melt in Whycocomagh Bay, a Canadian estuary in the Bras d'Or Lake system
Source: Copernicus journal article supplement (doi:10.5194/bg-16-3351-2019), 2019-09-05
Supplement: Supplementary file 1 [file bg-16-3351-2019-supplement.pdf]

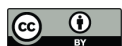

## *Supplement of*

# **Changes in gross oxygen production, net oxygen production, and air-water gas exchange during seasonal ice melt in Whycocomagh Bay, a Canadian estuary in the Bras d'Or Lake system**

**Cara C. Manning et al.**

*Correspondence to:* Cara C. Manning ([cmanning@alum.mit.edu](mailto:cmanning@alum.mit.edu))

The copyright of individual parts of the supplement might differ from the CC BY 4.0 License.

## 1 ADCP data

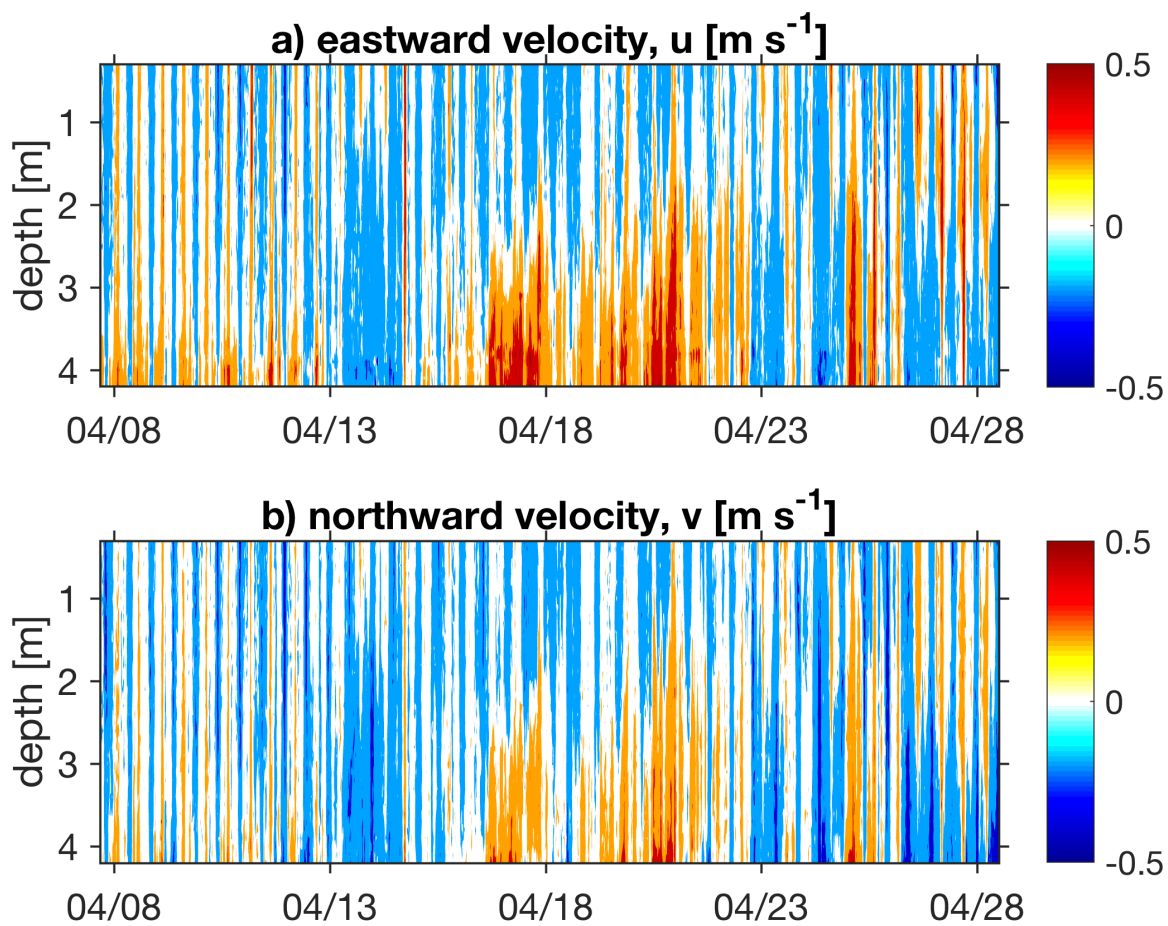

**Figure 1.** ADCP measurements showing water velocity at the center of Little Narrows channel. The velocity data are 20-min averages, measured every 0.1 m from 0.3–4.2 m depth.

## 2 Photographs of study area

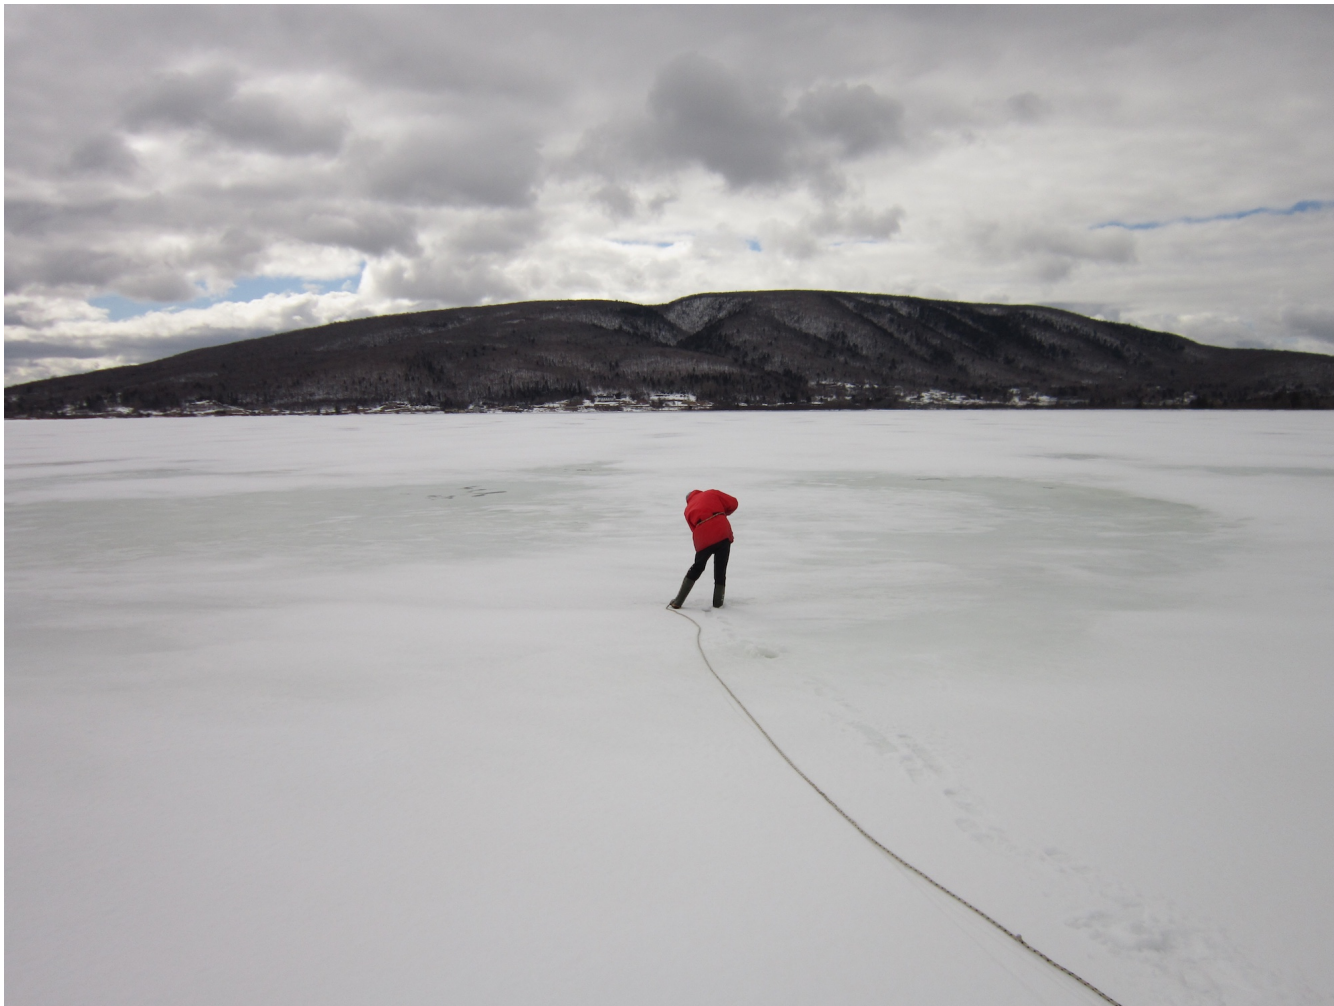

**Figure 2.** Photograph of Whycocomagh Bay taken on 28 March 2013.

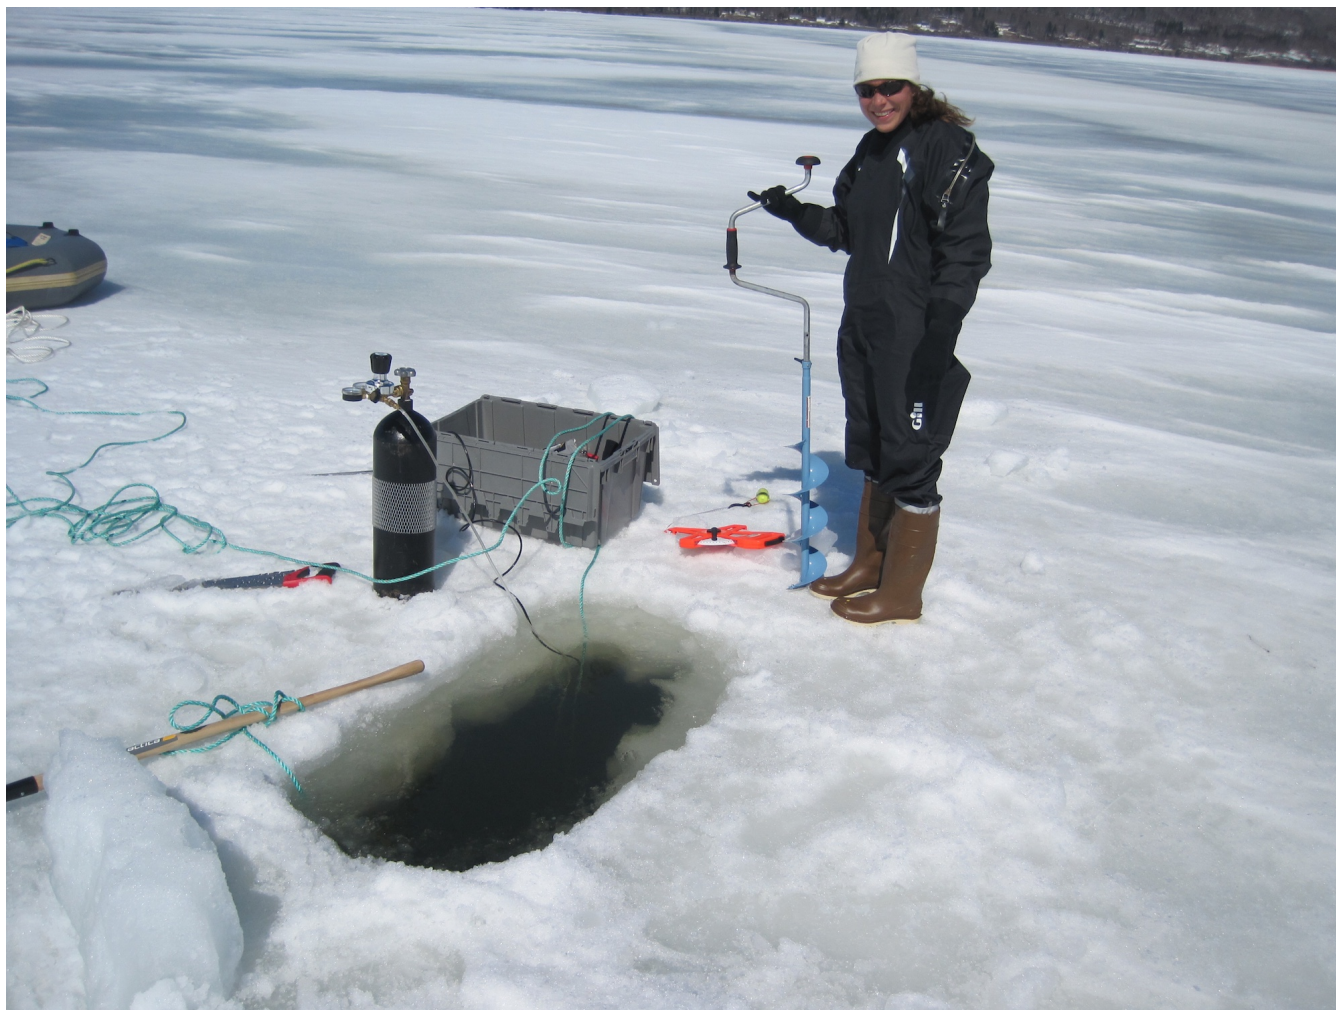

**Figure 3.** Photograph of the tracer injection that occurred through ice on 30 March 2013. The ice behind the injection site shows some bare areas and/or melt ponds, which facilitate the transmittance of light through the ice to the water below.



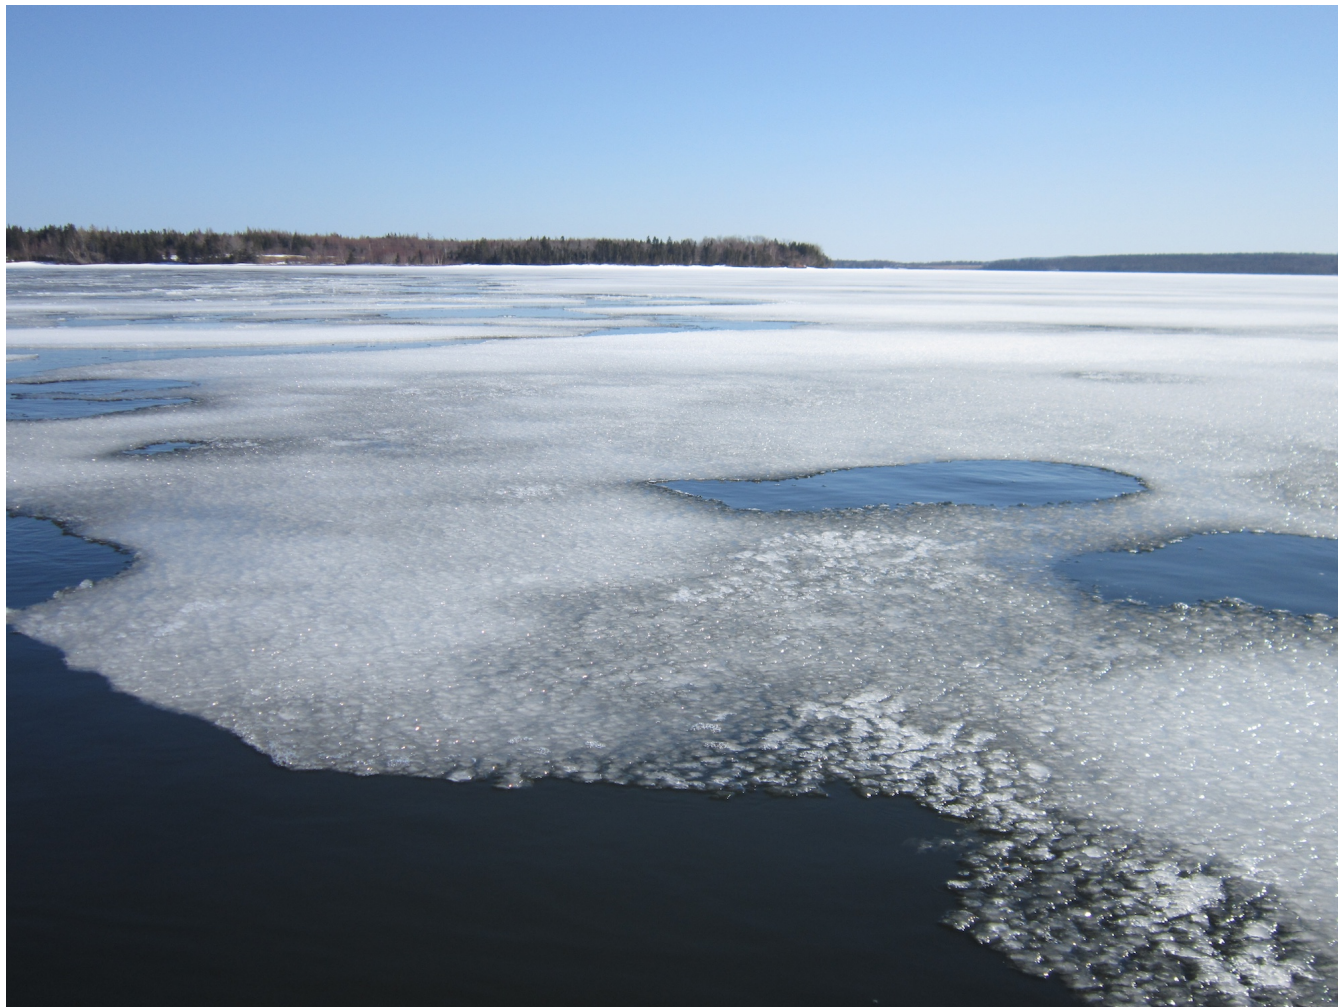

**Figure 4.** Photograph of the ice edge in Whycocomagh Bay (close to Little Narrows) taken on 7 April 2013.

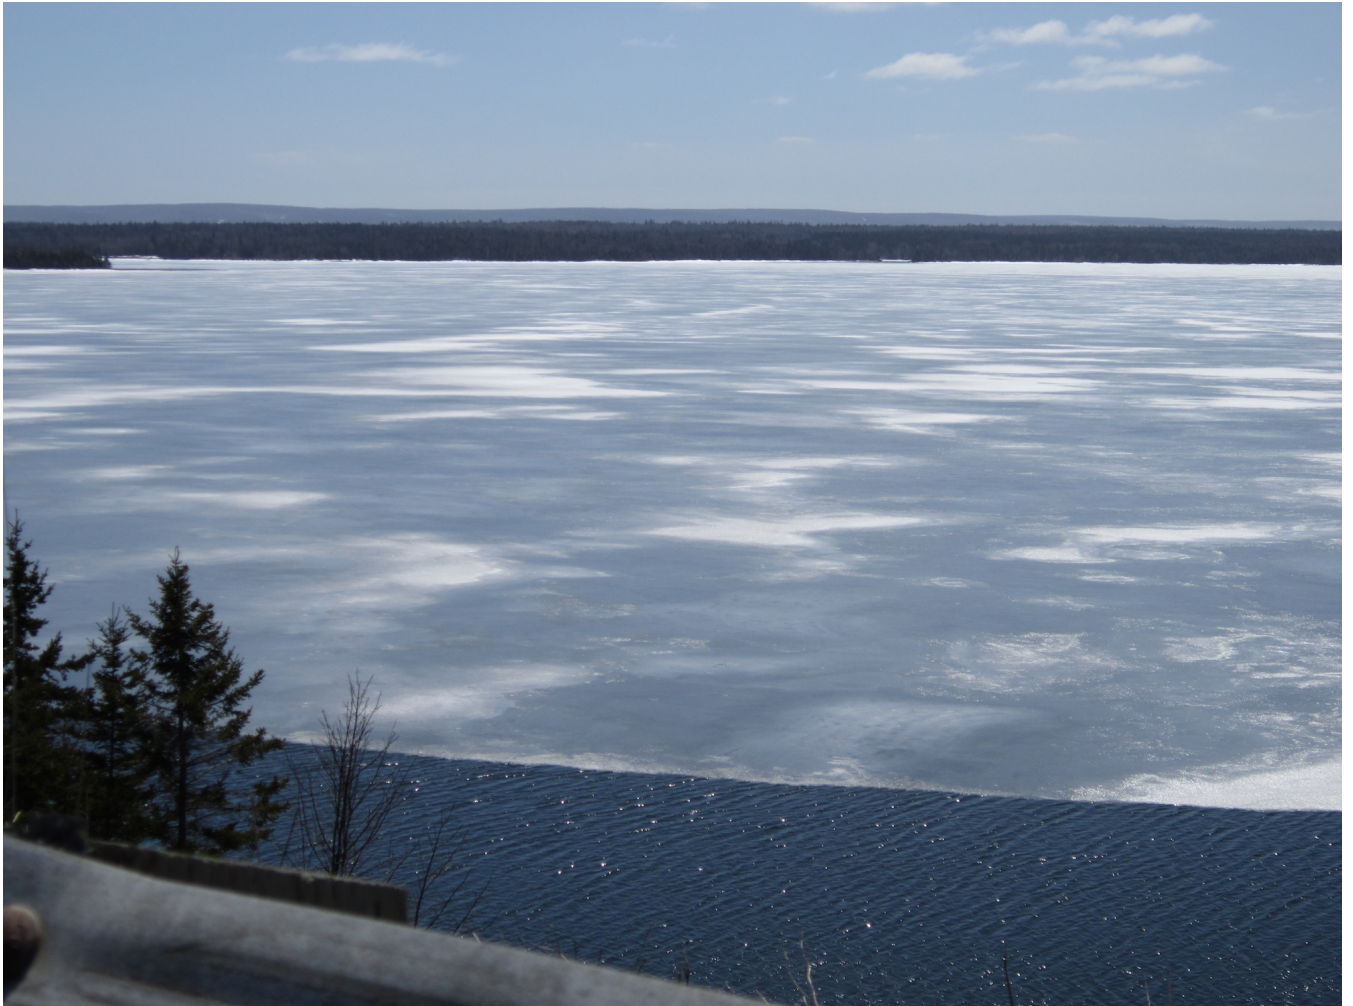

**Figure 5.** Photograph of Whycocomagh Bay taken on 12 April 2013. The photo shows that the ice is thin, with melt ponds in some areas, and allows some light to pass through to the water below.
